# Supplementary material for: Difluoromethylornithine (DFMO) Enhances the Cytotoxicity of PARP Inhibition in Ovarian Cancer Cells
Source: MDPI journal article supplement (doi:10.3390/medsci10020028), 2022-05-26

Figure S1

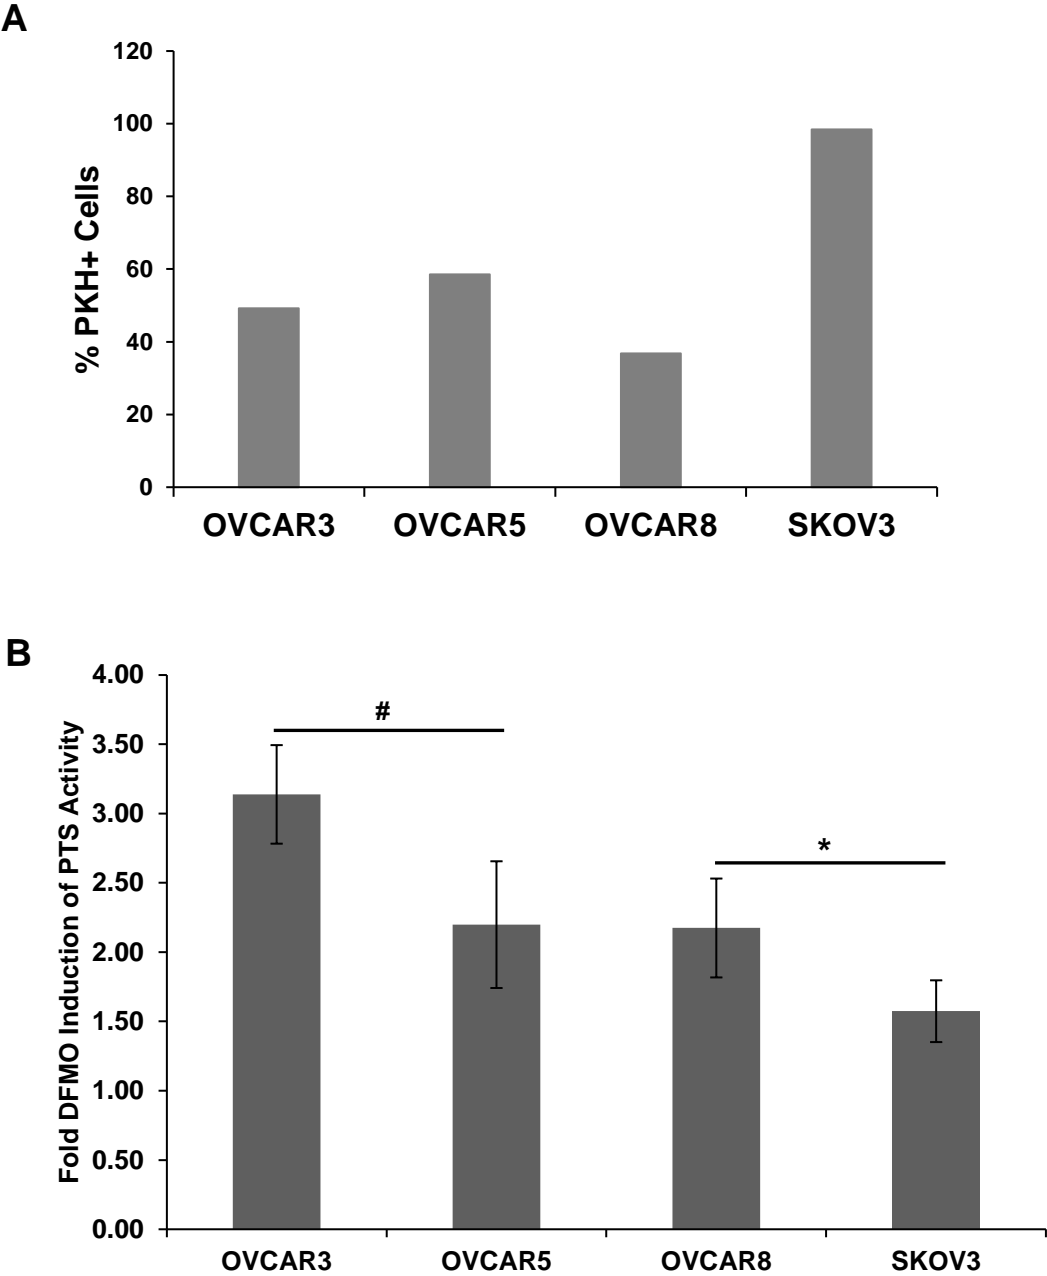

Figure S2

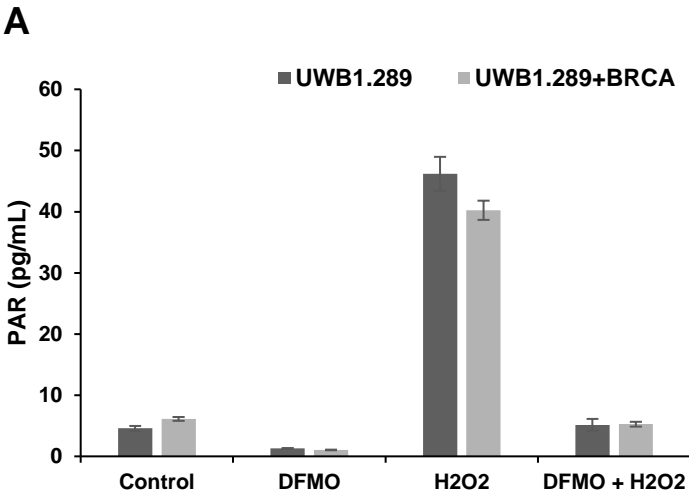

Figure S3

A

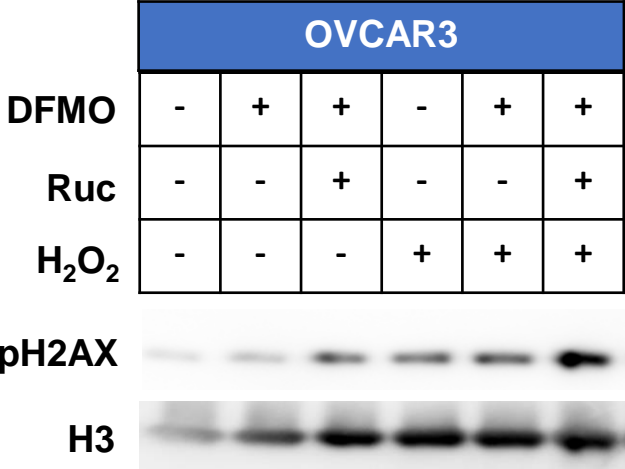

Figure S4A

Full Western blot images for Figure 4A

|                               |   |       |        |        |        |   |       |        |        |        |
|-------------------------------|---|-------|--------|--------|--------|---|-------|--------|--------|--------|
| DFMO                          | - | -     | -      | -      | -      | + | +     | +      | +      | +      |
| H <sub>2</sub> O <sub>2</sub> | - | 0 min | 15 min | 30 min | 45 min | - | 0 min | 15 min | 30 min | 45 min |

CHK2  
pS516  
(62 kDa)

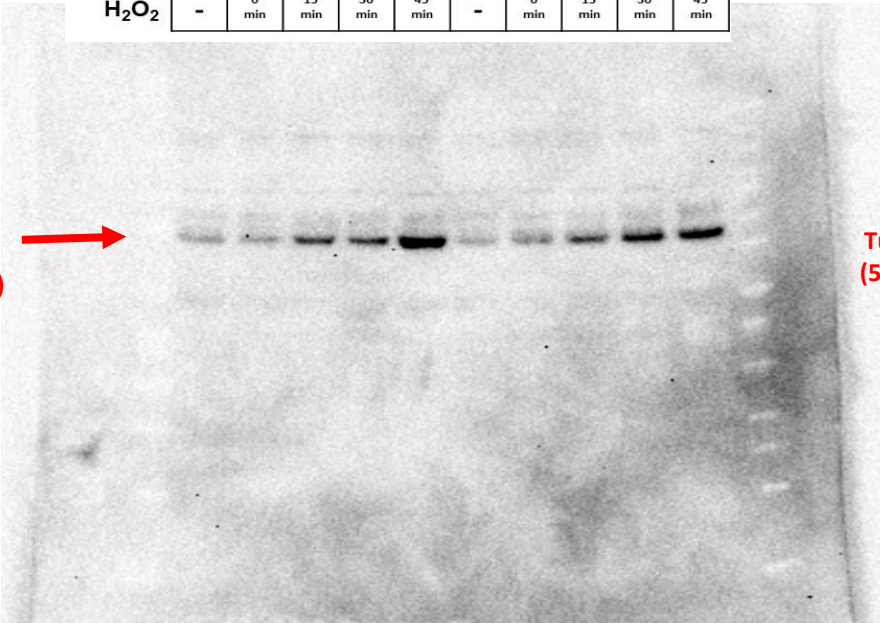

|                               |   |       |        |        |        |   |       |        |        |        |
|-------------------------------|---|-------|--------|--------|--------|---|-------|--------|--------|--------|
| DFMO                          | - | -     | -      | -      | -      | + | +     | +      | +      | +      |
| H <sub>2</sub> O <sub>2</sub> | - | 0 min | 15 min | 30 min | 45 min | - | 0 min | 15 min | 30 min | 45 min |

Tubulin  
(50 kDa)

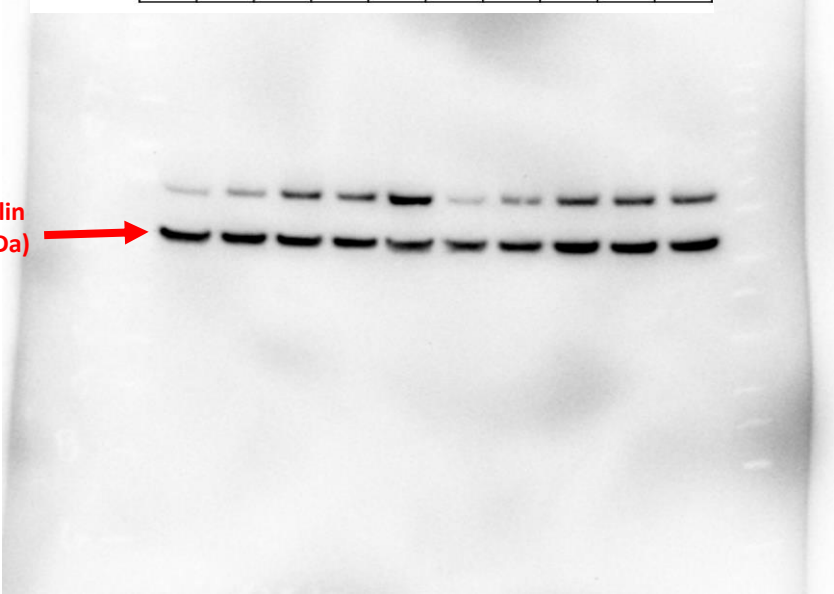

CHK2  
pT68

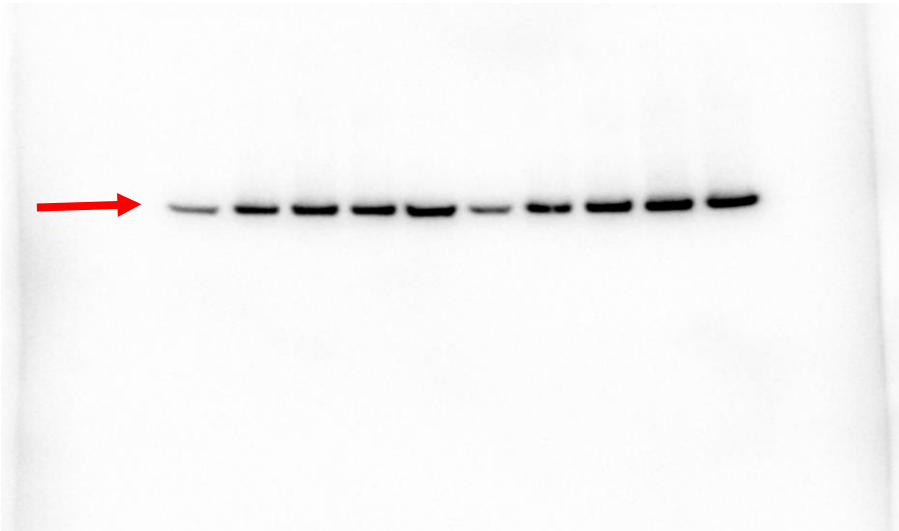

Figure S4B

Full Western blot images for Figure 4B

DFMO

H<sub>2</sub>O<sub>2</sub>

|   |        |        |        |        |        |       |   |        |        |        |        |        |       |
|---|--------|--------|--------|--------|--------|-------|---|--------|--------|--------|--------|--------|-------|
| - | -      | -      | -      | -      | -      | -     | + | +      | +      | +      | +      | +      | +     |
| 0 | 0.1 mM | 0.5 mM | 1.0 mM | 2.0 mM | 4.0 mM | 10 mM | 0 | 0.1 mM | 0.5 mM | 1.0 mM | 2.0 mM | 4.0 mM | 10 mM |

XRCC1  
pT284  
(~100 kDa)

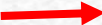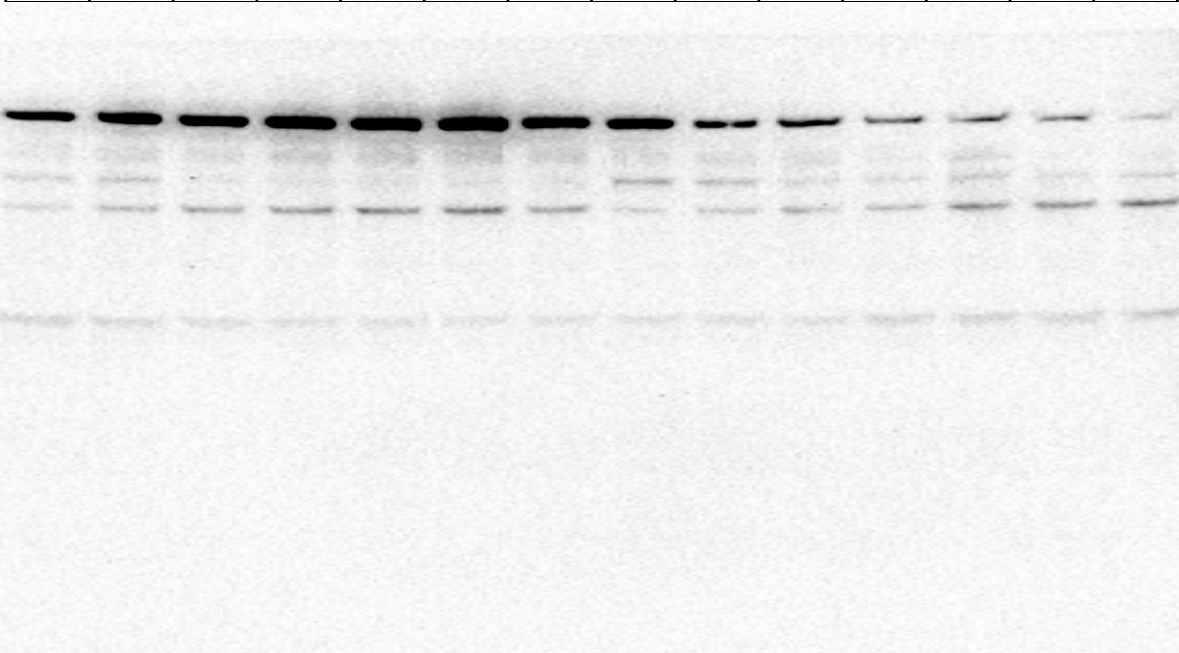

Tubulin  
(50 kDa)

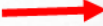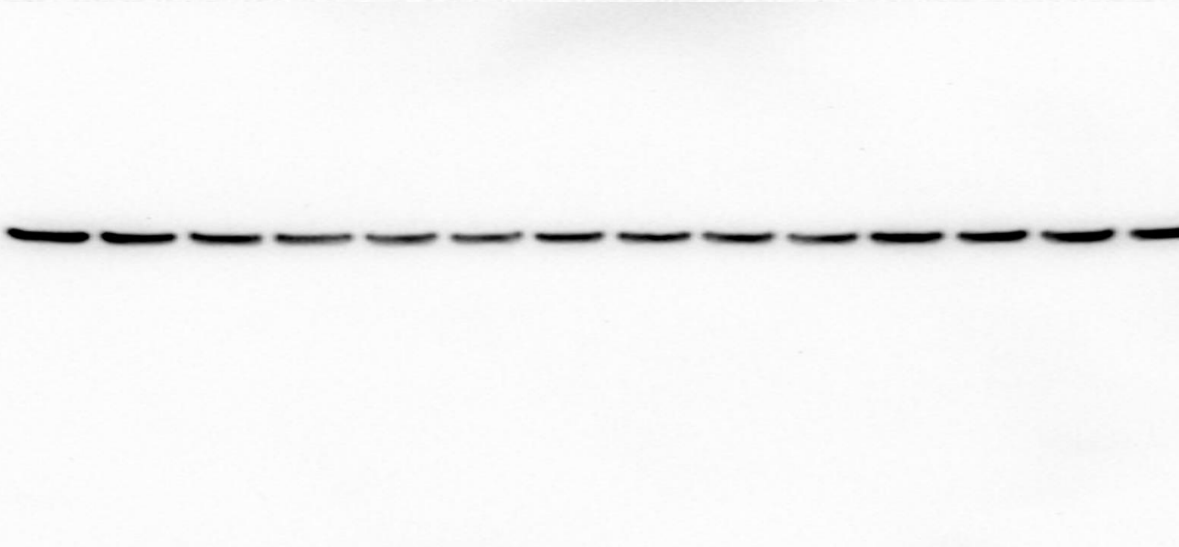

Supplement: s1 [file s1]
